# Supplementary material for: Manipulation of light transmission from stable magnetic microrods formed by the alignment of magnetic nanoparticles
Source: Royal Society of Chemistry journal article supplement (doi:10.1039/d0ra09511g), 2021-01-01
Supplement: d0ra09511g2.pdf [file d0ra09511g2.pdf]

## Supplementary Information

# Manipulation of light transmission from Stable Magnetic Microrods Formed by the Alignment of Magnetic Nanoparticles

Yoon Ji Seo<sup>†</sup>, Hyung Gyu Lee<sup>†</sup>, Jun Seok Yang, Hwanyeop Jeong, Jeonghun Han, Ji-Hye Kim, Hyung-Jun Koo, and Hyunsik Yoon\*

*Department of Chemical Engineering, Seoul National University of Science & Technology,  
Seoul, 01811, Korea*

<sup>†</sup>These authors contributed equally to this work.

\*e-mail of corresponding author: hsyoon@seoultech.ac.kr

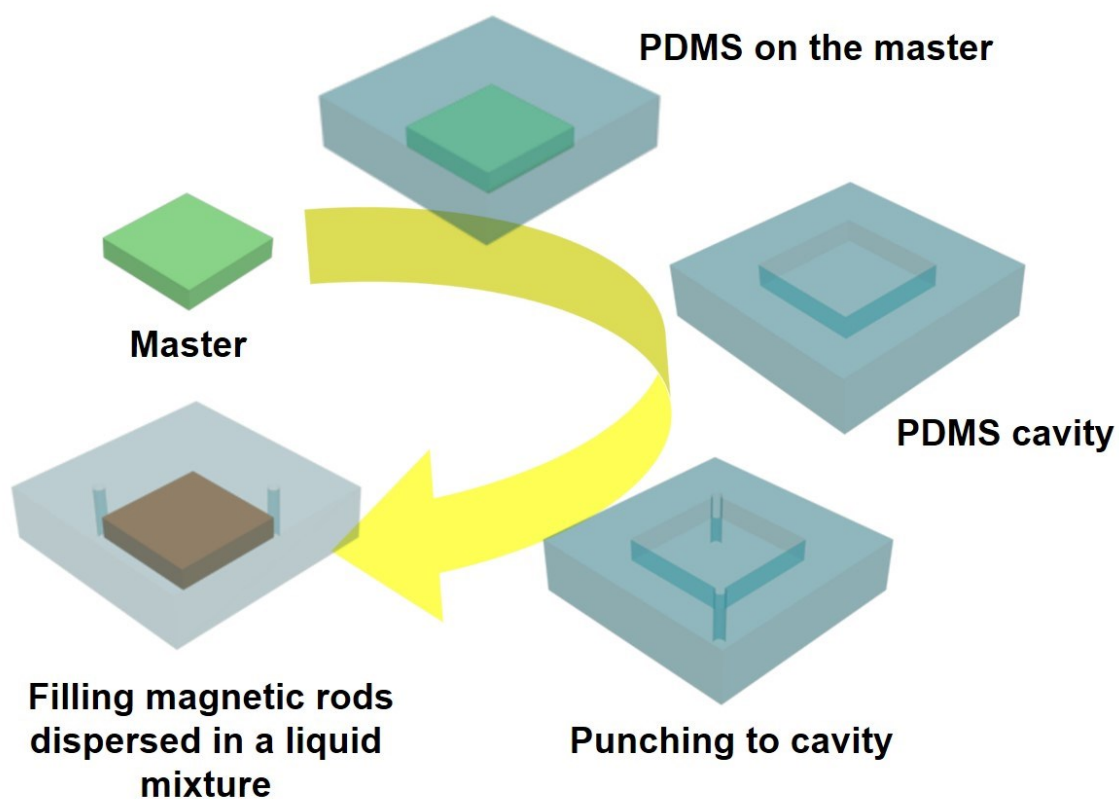

Figure S1. Schematic illustration of the fabrication of a smart window.

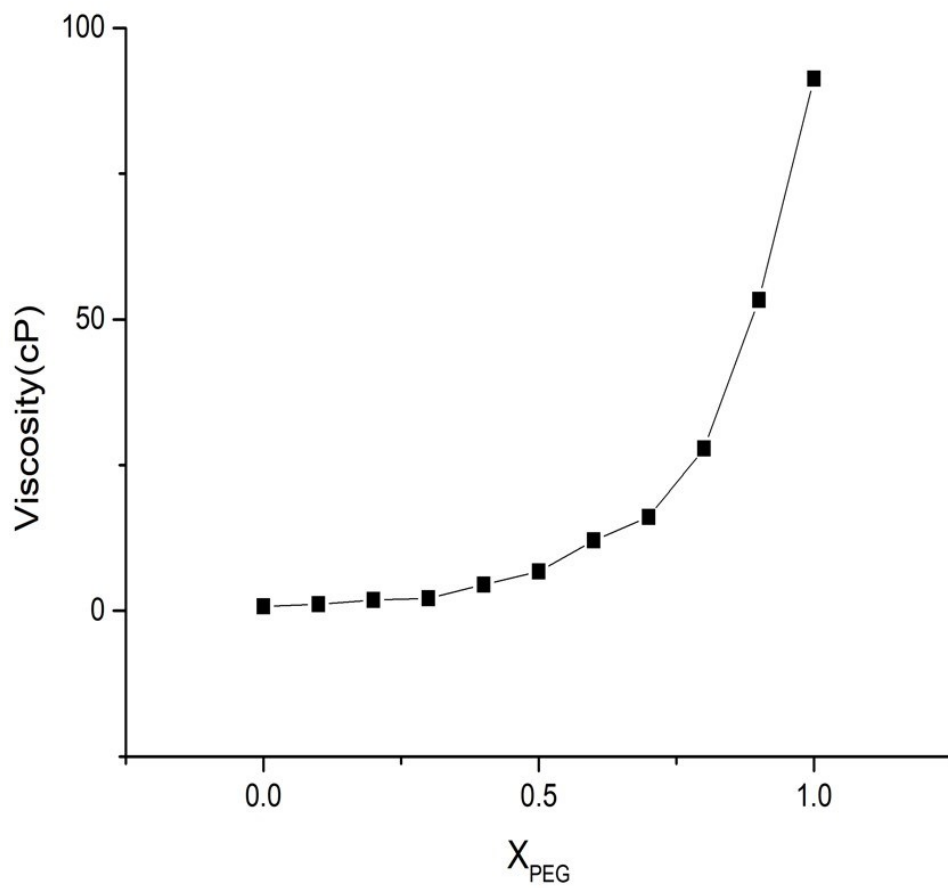

Figure S2. Graph of the viscosity in different PEG fraction.
